# Supplementary material for: Evaluating Speciality Preferences and Career Choices Among Nigerian Medical Students, Interns, and Preresidency Doctors: A Systematic Review and Meta-Analysis
Source: Research Square preprint supplement (doi:10.21203/rs.3.rs-8470357/v1), 2026-02-03
Supplement: Supplementary file 1 [file 9fa2e81476f2bb8d6e715209.xlsx]

## Sheet: Sheet1
Author (Year)	Q1: Aims clear?	Q2: Design appropriate?	Q3: Sample size justified?	Q4: Population defined?	Q5: Sample frame appropriate?	Q6: Selection representative?	Q7: Non-responders addressed?	Q8: Variables appropriate?	Q9: Measures piloted/published?	Q10: Stats significance clear?	Q11: Methods repeatable?	Q12: Basic data described?	Q13: Response rate raises concern?	Q14: Non-responders described?	Q15: Results consistent?	Q16: All analyses presented?	Q17: Discussion justified?	Q18: Limitations discussed?	Q19: Funding/conflicts affect?	Q20: Ethical approval/consent?	Overall RoB
Olajide T et al. (2025)	Y	Y	DK	Y	Y	N	N	Y	DK	Y	Y	Y	Y	N	Y	Y	Y	Y	DK	Y	Moderate
Okonkwo TC et al. (2024)	Y	Y	DK	Y	Y	N	N	Y	DK	Y	Y	Y	Y	N	Y	Y	Y	Y	DK	DK	Moderate
Ossai EN et al. (2016)	Y	Y	DK	Y	Y	Y	Y	Y	Y	Y	Y	Y	N	Y	Y	Y	Y	Y	DK	Y	Low
Eze BI et al. (2011)	Y	Y	DK	Y	Y	N	Y	Y	Y	Y	Y	Y	N	N	Y	Y	Y	Y	DK	Y	Moderate
Onyemaechi NOC et al. (2017)	Y	Y	DK	Y	Y	N	N	Y	Y	Y	Y	Y	N	N	Y	Y	Y	Y	DK	DK	Moderate
Falase B et al. (2022)	Y	Y	DK	Y	Y	Y	N	Y	Y	Y	Y	Y	N	N	Y	Y	Y	Y	DK	DK	Moderate
Asani M.O. et al. (2016)	Y	Y	DK	Y	Y	N	N	Y	Y	Y	Y	Y	N	N	Y	Y	Y	Y	DK	DK	Moderate
Okonta K.E. et al. (2015)	Y	Y	DK	Y	Y	N	N	Y	DK	Y	Y	Y	N	N	Y	Y	Y	Y	DK	DK	Moderate
Odusanya OO et al. (2000)	Y	Y	DK	Y	Y	Y	N	Y	DK	DK	Y	Y	N	N	Y	Y	Y	Y	DK	DK	Moderate
Akinyinka MR et al. (2017)	Y	Y	DK	Y	Y	Y	N	Y	DK	Y	Y	Y	N	N	Y	Y	Y	Y	DK	Y	Moderate
Ashipa T. et al. (2017)	Y	Y	DK	Y	Y	Y	N	Y	Y	Y	Y	Y	N	N	Y	Y	Y	Y	DK	DK	Moderate
Ohaeri J.U. et al. (1993)	Y	Y	DK	Y	Y	N	N	Y	DK	DK	Y	Y	N	N	Y	Y	Y	Y	DK	DK	Moderate
Odusanya O.O. et al. (1995)	Y	Y	DK	Y	Y	N	N	Y	DK	DK	Y	Y	N	N	Y	Y	Y	Y	DK	DK	Moderate
Madu AJ et al. (2014)	Y	Y	DK	Y	Y	N	N	Y	Y	Y	Y	Y	N	N	Y	Y	Y	Y	DK	Y	Moderate
Adeboye A. et al. (2006)	Y	Y	DK	Y	Y	N	N	Y	DK	DK	Y	Y	N	N	Y	Y	Y	Y	DK	DK	Moderate
Abioye I.A. et al. (2012)	Y	Y	DK	Y	Y	Y	N	Y	DK	Y	Y	Y	N	N	Y	Y	Y	Y	DK	DK	Moderate
Ohaeri J.U. et al. (1992)	Y	Y	DK	Y	Y	N	N	Y	DK	DK	Y	Y	N	N	Y	Y	Y	Y	DK	DK	Moderate
Odusanya OO, Nwawolo CC (2001)	Y	Y	DK	Y	Y	N	N	Y	DK	Y	Y	Y	N	N	Y	Y	Y	Y	DK	DK	Moderate
Imediegwu KU et al. (2022)	Y	Y	DK	Y	Y	N	N	Y	DK	Y	Y	Y	Y	N	Y	Y	Y	Y	DK	DK	Moderate
Ezegwui C.O. et al. (2022)	Y	Y	DK	Y	Y	N	N	Y	DK	Y	Y	Y	Y	N	Y	Y	Y	Y	DK	DK	Moderate
